# Supplementary material for: SARS-CoV-2 outbreaks in secondary school settings in the Netherlands during fall 2020; silent circulation
Source: Springer Nature journal article supplement (doi:10.1186/s12879-022-07904-3), 2022-12-26

Figure S1. Schematic overview of the study design

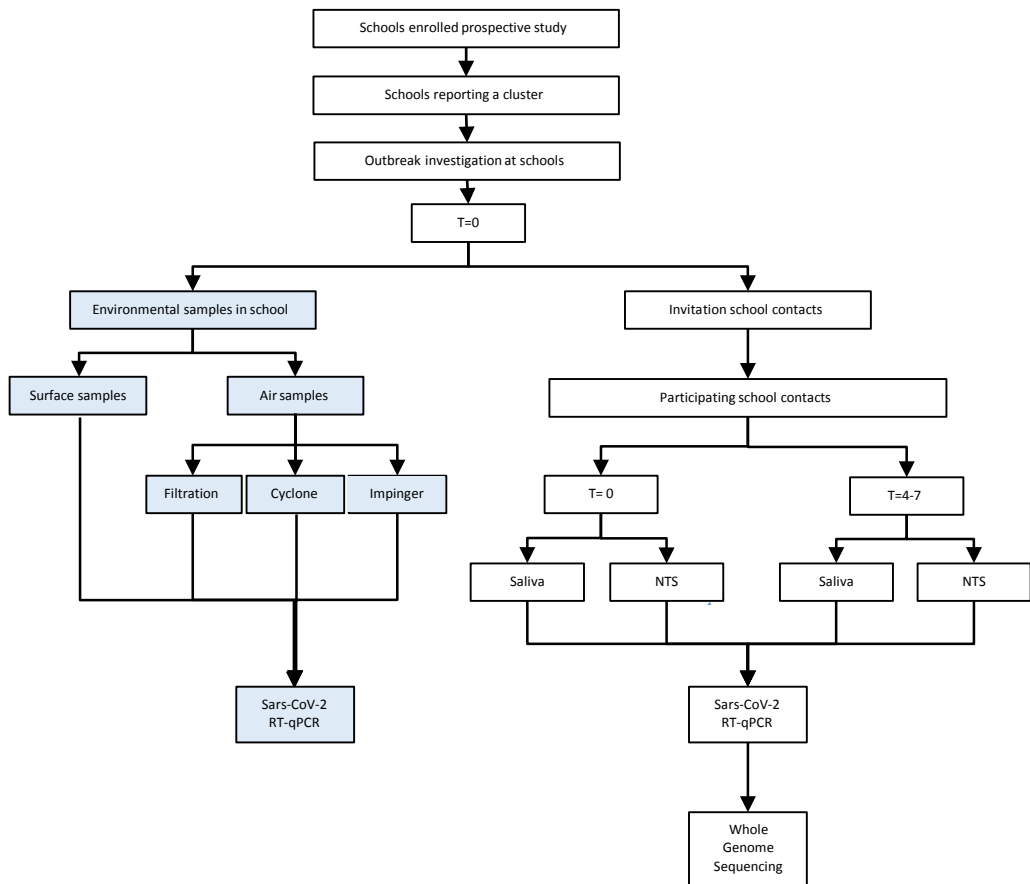

Supplement: MOESM2 [file 23858882]
